# Supplementary material for: Comparative Analysis of Molecular RFLP and SNP Markers in Assessing and Understanding the Genetic Diversity of Various Chicken Breeds
Source: MDPI journal article supplement (doi:10.3390/genes13101876), 2022-10-16
Supplement: s1 [file s1]

**Table S1.** Population characteristics<sup>1</sup> of the chicken germplasm breeds in 2007 and 2017.

| Breeds                    | Populations in 2007    |    |       |       |                | Populations in 2017    |    |       |       |                |
|---------------------------|------------------------|----|-------|-------|----------------|------------------------|----|-------|-------|----------------|
|                           | No. of birds per breed |    |       | $N_e$ | $\Delta F$ , % | No. of birds per breed |    |       | $N_e$ | $\Delta F$ , % |
|                           | ♀                      | ♂  | Total |       |                | ♀                      | ♂  | Total |       |                |
| Australorp Black Speckled | 214                    | 26 | 240   | 92.7  | 0.5            | 86                     | 13 | 99    | 45.2  | 1.1            |
| Brahma Light              | 46                     | 13 | 59    | 40.5  | 1.2            | 37                     | 8  | 45    | 26.3  | 1.9            |
| Cochin Blue               | 89                     | 15 | 104   | 51.3  | 1.0            | 57                     | 10 | 67    | 34.0  | 1.6            |
| Faverolles Salmon         | 42                     | 9  | 51    | 29.6  | 1.7            | 67                     | 12 | 79    | 40.7  | 1.2            |
| Leningrad Golden-and-gray | 308                    | 38 | 346   | 135.3 | 0.4            | 130                    | 15 | 145   | 53.8  | 0.9            |
| Leningrad Mille Fleur     | 173                    | 23 | 196   | 81.2  | 0.6            | 253                    | 46 | 299   | 155.7 | 0.3            |
| Moscow Game               | 43                     | 10 | 53    | 32.5  | 1.5            | 98                     | 17 | 115   | 57.9  | 0.9            |
| New Hampshire             | 147                    | 17 | 164   | 61.0  | 0.8            | 85                     | 15 | 100   | 51.0  | 1.0            |
| Orloff Mille Fleur        | 42                     | 12 | 54    | 37.3  | 1.3            | 134                    | 23 | 157   | 78.5  | 0.6            |
| Pervomai                  | 157                    | 18 | 175   | 64.6  | 0.8            | 48                     | 10 | 58    | 33.1  | 1.5            |
| Pushkin                   | 575                    | 86 | 661   | 299.2 | 0.2            | 264                    | 32 | 296   | 114.2 | 0.4            |
| Rhode Island Red          | 106                    | 14 | 120   | 49.5  | 1.0            | 156                    | 50 | 206   | 151.5 | 0.3            |
| Russian White             | 104                    | 17 | 121   | 58.4  | 0.9            | 196                    | 40 | 236   | 132.9 | 0.4            |
| Sussex Light              | 135                    | 15 | 150   | 54.0  | 0.9            | 68                     | 7  | 75    | 25.4  | 2.0            |
| Tsarskoye Selo            | 103                    | 19 | 122   | 64.2  | 0.8            | 252                    | 41 | 293   | 141.1 | 0.4            |
| Uzbek Game                | 44                     | 11 | 55    | 35.2  | 1.4            | 115                    | 20 | 135   | 68.1  | 0.7            |
| Yurlov Crower             | 531                    | 63 | 594   | 225.3 | 0.2            | 194                    | 34 | 228   | 115.7 | 0.4            |
| Zagorsk Salmon            | 194                    | 21 | 215   | 75.8  | 0.7            | 89                     | 10 | 99    | 36.0  | 1.4            |

<sup>1</sup>  $N_e$ , effective population size estimated by the formula  $N_e = 4N_mN_f/(N_m + N_f)$ , where  $N_m$  is the number of males and  $N_f$  is the number of females [74];  $\Delta F$ , rate of inbreeding increase per generation calculated by the formula by  $\Delta F = 1/(2N_e)$ , where  $F$  is the inbreeding coefficient [75], and multiplied by 100%.

## References

74. Kliman, R.; Sheehy, B.; Schultz, J. Genetic drift and effective population size. *Nature Educ.* **2008**, *1*(3):3.
75. Falconer, D.S. *Introduction to Quantitative Genetics*, 3rd ed. Longman: New York, USA, 1989.
