# Supplementary material for: Comparative Analysis of Molecular RFLP and SNP Markers in Assessing and Understanding the Genetic Diversity of Various Chicken Breeds
Source: Genes (Basel). 2022 Oct 16;13(10):1876. doi: 10.3390/genes13101876 (PMC9601448; doi:10.3390/genes13101876)
Supplement: Supplementary file 1 [file genes-13-01876-s001.zip]

Archive with 5 entries (5 files):
- Suppl Information S1.pdf
- Suppl Information S2.pdf
- Suppl Table S1.pdf
- Suppl Table S2.xlsx
- Suppl Table S3.xlsx
