# Supplementary material for: Comparative Analysis of Molecular RFLP and SNP Markers in Assessing and Understanding the Genetic Diversity of Various Chicken Breeds
Source: Genes (Basel). 2022 Oct 16;13(10):1876. doi: 10.3390/genes13101876 (PMC9601448; doi:10.3390/genes13101876)
Supplement: Supplementary file 1 [file genes-13-01876-s001.zip › Suppl Table S2.xlsx]

## Sheet: Sheet1
Supplementary Table S2. Pairwise genetic FST distances between the studied 18 chicken breeds based on multilocus DNA fingerprinting.
	YC	OM	UG	MG	Ts	LGG	LMF	NH	Pu	ABS	SL	Pm	ZS	RIR	RW	FS	BL	CB
YC	0	0.1	0.07	0.05	-99	-99	-99	0.12	-99	-99	-99	-99	0.11	-99	-99	-99	-99	-99
OM	0.1	0	0.14	0.09	-99	-99	-99	-99	-99	-99	-99	-99	-99	-99	-99	-99	-99	-99
UG	0.07	0.14	0	0.06	-99	-99	-99	-99	-99	-99	-99	-99	-99	-99	-99	-99	-99	-99
MG	0.05	0.09	0.06	0	-99	-99	-99	-99	-99	-99	-99	-99	-99	-99	-99	-99	-99	-99
Ts	-99	-99	-99	-99	0	0.08	0.1	0.08	-99	-99	-99	-99	-99	-99	-99	-99	-99	-99
LGG	-99	-99	-99	-99	0.08	0	0.09	0.12	0.12	0.1	-99	-99	-99	-99	-99	-99	-99	-99
LMF	-99	-99	-99	-99	0.1	0.09	0	0.115	-99	-99	-99	-99	0.17	-99	-99	-99	-99	-99
NH	0.12	-99	-99	-99	0.08	0.12	0.115	0	-99	-99	-99	-99	-99	-99	-99	-99	-99	-99
Pu	-99	-99	-99	-99	-99	0.12	-99	-99	0	0.05	-99	-99	-99	-99	-99	-99	-99	-99
ABS	-99	-99	-99	-99	-99	0.1	-99	-99	0.05	0	-99	-99	-99	-99	-99	-99	-99	-99
SL	-99	-99	-99	-99	-99	-99	-99	-99	-99	-99	0	0.095	0.15	0.135	-99	-99	0.09	-99
Pm	-99	-99	-99	-99	-99	-99	-99	-99	-99	-99	0.095	0	0.105	0.1	-99	-99	-99	-99
ZS	0.11	-99	-99	-99	-99	-99	-99	0.17	-99	-99	0.15	0.105	0	0.105	-99	-99	-99	-99
RIR	-99	-99	-99	-99	-99	-99	-99	-99	-99	-99	0.135	0.1	0.105	0	-99	-99	-99	-99
RW	-99	-99	-99	-99	-99	-99	-99	-99	-99	-99	-99	-99	-99	-99	0	0.21	0.23	0.125
FS	-99	-99	-99	-99	-99	-99	-99	-99	-99	-99	-99	-99	-99	-99	0.21	0	0.1	0.095
BL	-99	-99	-99	-99	-99	-99	-99	-99	-99	-99	0.09	-99	-99	-99	0.23	0.1	0	0.085
CB	-99	-99	-99	-99	-99	-99	-99	-99	-99	-99	-99	-99	-99	-99	0.125	0.095	0.085	0
The value -99 indicates an unknown distance. These gaps in the distance matrix were filled using tree inference from incomplete matrices (tree reconstruction method MW*; Makarenkov and Lapointe, 2004).
	RW	FS	BL	CB
RW	0	0.21	0.23	0.125
FS	0.21	0	0.1	0.095
BL	0.23	0.1	0	0.085
CB	0.125	0.095	0.085	0
