# Supplementary material for: Comparative Analysis of Molecular RFLP and SNP Markers in Assessing and Understanding the Genetic Diversity of Various Chicken Breeds
Source: Genes (Basel). 2022 Oct 16;13(10):1876. doi: 10.3390/genes13101876 (PMC9601448; doi:10.3390/genes13101876)
Supplement: Supplementary file 1 [file genes-13-01876-s001.zip › Suppl Table S3.xlsx]

## Sheet: Sheet1
Supplementary Table S3. Pairwise genetic FST distances between the studied 18 chicken breeds based on SNP genotypes.
	RIR	RW	CBl	FS	MG	NH	SL	UG	OMF	YC	Pu	Ts	LGG	LMF	ZS	Pm	ABS	BL
RIR	0
RW	0.161	0
CBl	0.123	0.192	0
FS	0.145	0.197	0.171	0
MG	0.044	0.127	0.097	0.119	0
NH	0.027	0.136	0.103	0.123	0.025	0
SL	0.106	0.175	0.141	0.168	0.072	0.08	0
UG	0.081	0.141	0.11	0.136	0.034	0.057	0.097	0
OMF	0.116	0.16	0.148	0.166	0.084	0.091	0.135	0.097	0
YC	0.103	0.165	0.134	0.163	0.067	0.08	0.118	0.058	0.125	0
Pu	0.144	0.148	0.172	0.185	0.111	0.119	0.158	0.124	0.152	0.148	0
Ts	0.072	0.156	0.129	0.147	0.043	0.041	0.102	0.079	0.112	0.102	0.138	0
LGG	0.15	0.173	0.182	0.196	0.115	0.121	0.167	0.134	0.159	0.157	0.15	0.138	0
LMF	0.081	0.155	0.136	0.153	0.065	0.053	0.115	0.091	0.116	0.112	0.133	0.083	0.139	0
ZS	0.148	0.203	0.185	0.168	0.121	0.127	0.166	0.137	0.173	0.162	0.189	0.15	0.2	0.153	0
Pm	0.111	0.182	0.148	0.175	0.075	0.085	0.054	0.097	0.14	0.12	0.166	0.109	0.172	0.122	0.17	0
ABS	0.121	0.15	0.15	0.166	0.09	0.095	0.135	0.104	0.134	0.125	0.107	0.116	0.146	0.111	0.17	0.142	0
BL	0.193	0.278	0.208	0.247	0.171	0.175	0.208	0.19	0.225	0.216	0.258	0.198	0.263	0.208	0.261	0.215	0.229	0
